# Supplementary material
Source: PubMed Central journal article supplement (PMC8284907)

## Supplemental Information

**Supplementary Table 1 – Summary of Mouse Breeding and observation cohorts**

| Group | Breeding                                                | Housing Partners<br>(from birth)                          | Housing Partners<br>(post-weaning)                        | Gut<br>Microbiota | Incidence of<br>Diabetes                                                                     | Related<br>Figures        |
|-------|---------------------------------------------------------|-----------------------------------------------------------|-----------------------------------------------------------|-------------------|----------------------------------------------------------------------------------------------|---------------------------|
| 1     | <i>Nod2</i> <sup>+/-</sup> x <i>Nod2</i> <sup>+/-</sup> | <i>Nod2</i> <sup>-/-</sup> and <i>Nod2</i> <sup>+/+</sup> | <i>Nod2</i> <sup>-/-</sup> and <i>Nod2</i> <sup>+/+</sup> | Shared            | Similar                                                                                      | Figure 1A (CH)            |
| 2     | <i>Nod2</i> <sup>+/-</sup> x <i>Nod2</i> <sup>+/-</sup> | <i>Nod2</i> <sup>-/-</sup> and <i>Nod2</i> <sup>+/+</sup> | Housed by genotype                                        | Different         | <i>Nod2</i> <sup>-/-</sup> have<br>reduced diabetes<br>vs <i>Nod2</i> <sup>+/+</sup>         | Figure 1B (NCH)           |
| 3     | <i>Nod2</i> <sup>-/-</sup> x <i>Nod2</i> <sup>-/-</sup> | <i>Nod2</i> <sup>-/-</sup>                                | <i>Nod2</i> <sup>-/-</sup>                                | Different         | NCH <i>Nod2</i> <sup>-/-</sup> have<br>reduced diabetes<br>vs NCH <i>Nod2</i> <sup>+/+</sup> | Figure 1C<br>(CH and NCH) |
| 4     | <i>Nod2</i> <sup>+/+</sup> x <i>Nod2</i> <sup>+/+</sup> | <i>Nod2</i> <sup>+/+</sup>                                | <i>Nod2</i> <sup>+/+</sup>                                | Different         | NCH <i>Nod2</i> <sup>-/-</sup> have<br>reduced diabetes<br>vs NCH <i>Nod2</i> <sup>+/+</sup> | Figure 1C<br>(CH and NCH) |

CH = Cohoused - both genotypes in each cage (*Nod2*<sup>+/+</sup> and *Nod2*<sup>-/-</sup>)

NCH = Non-cohoused - only one genotype in each cage (*Nod2*<sup>+/+</sup> or *Nod2*<sup>-/-</sup>)

A

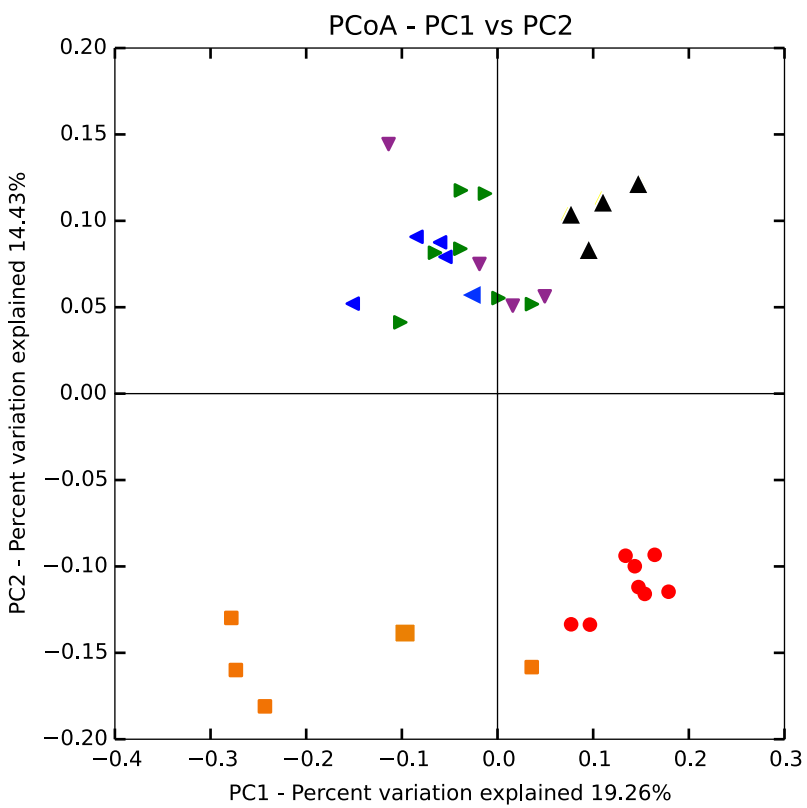

- ▶ *Nod2*<sup>+/+</sup>NOD – 3 weeks of age
- ▲ *Nod2*<sup>+/+</sup>NOD NCH – 8-9 weeks of age
- ▼ *Nod2*<sup>+/+</sup>NOD CH – 8-9 weeks of age
- *Nod2*<sup>-/-</sup>NOD – 3 weeks of age
- *Nod2*<sup>-/-</sup>NOD NCH – 8-9 weeks of age
- ◀ *Nod2*<sup>-/-</sup>NOD CH – 8-9 weeks of age

B

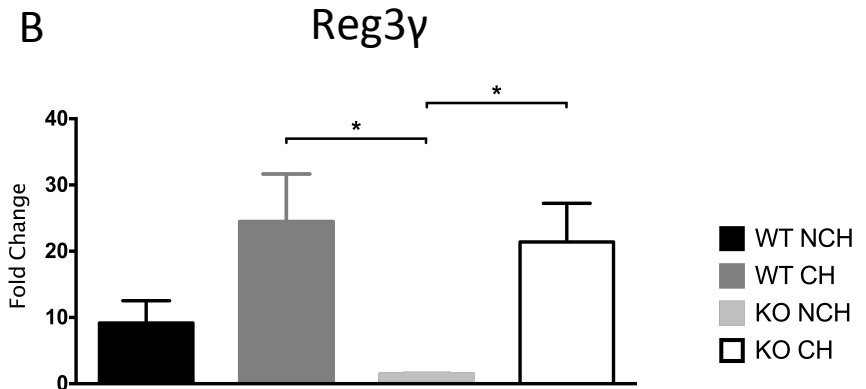

C

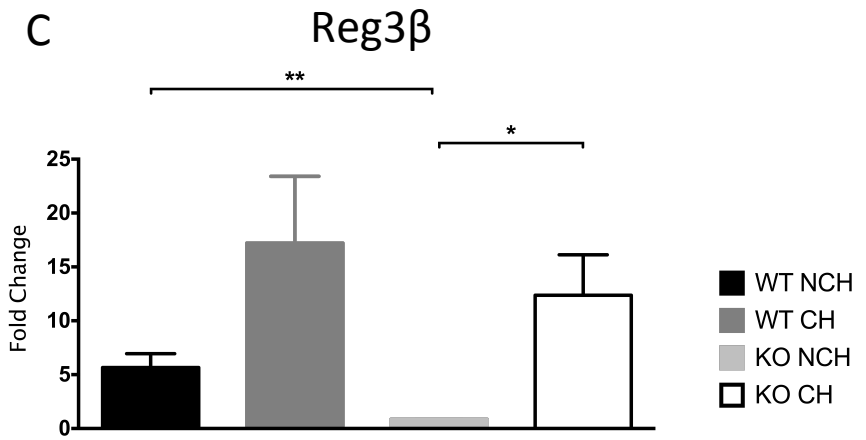

D

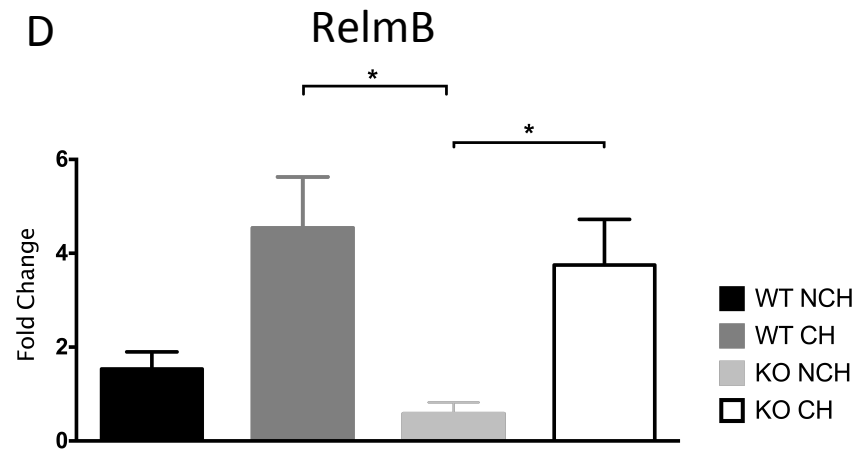

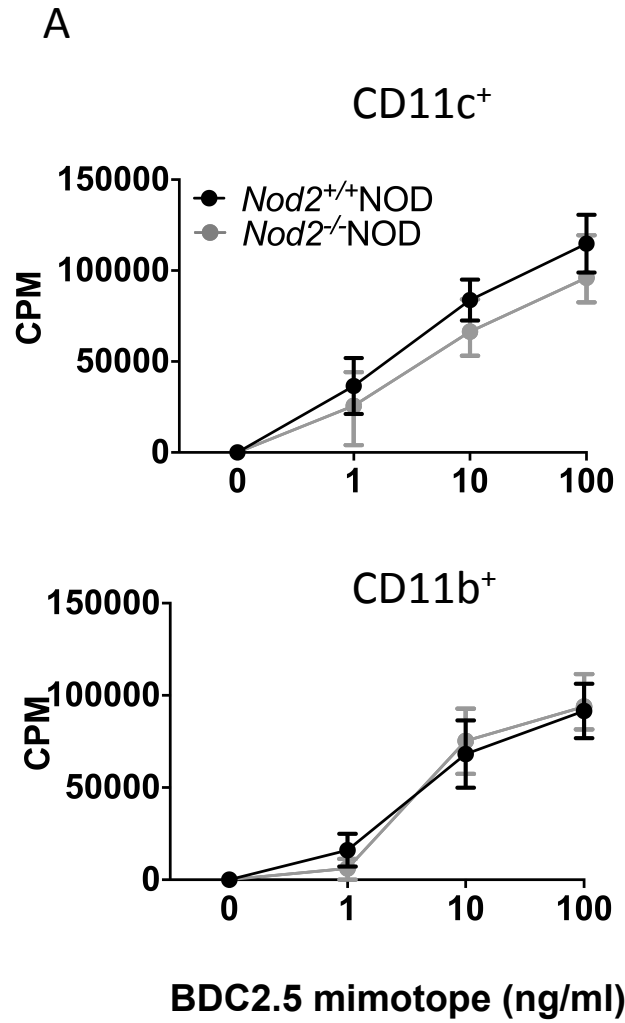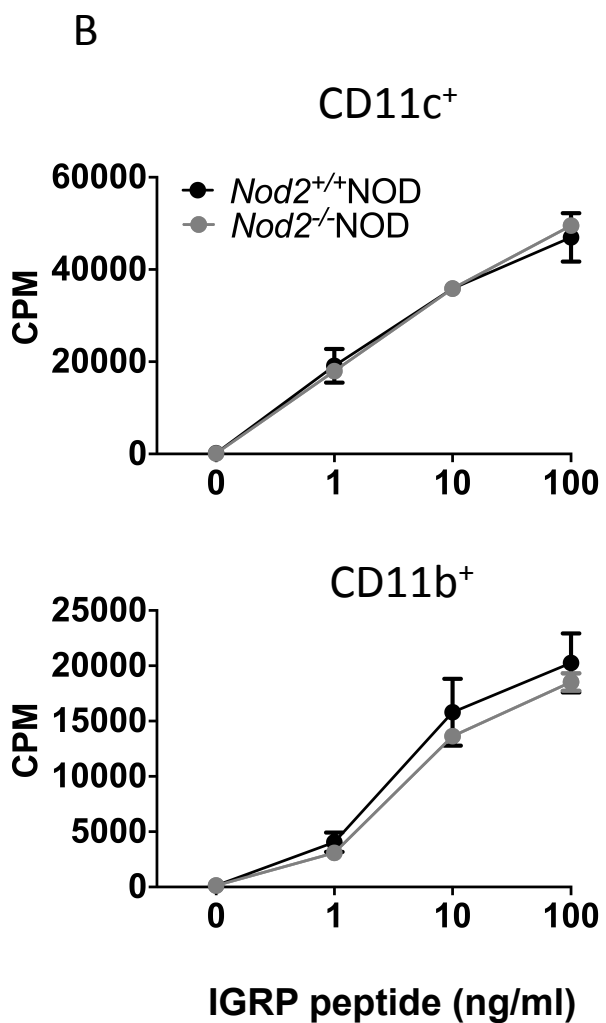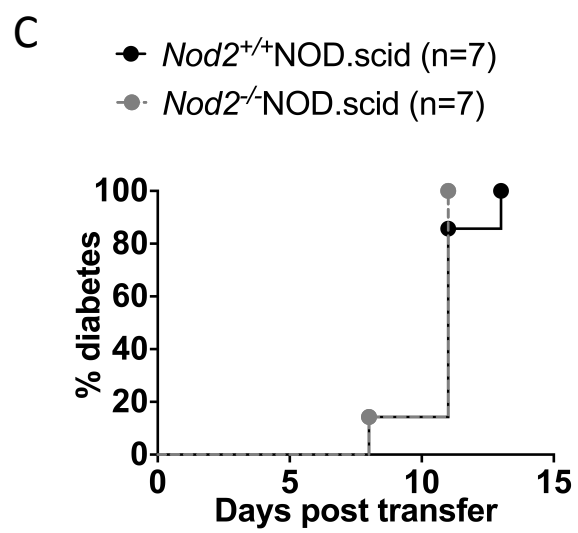

A

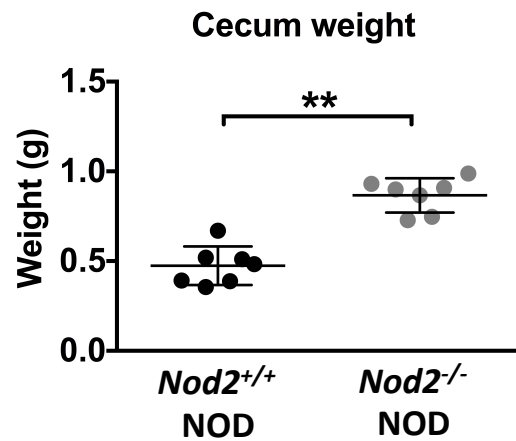

B

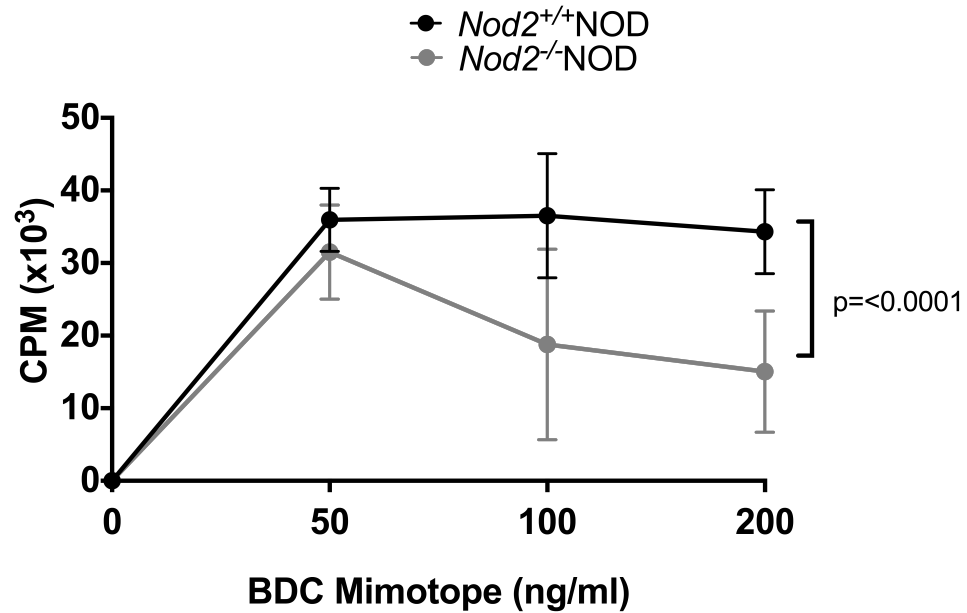

C

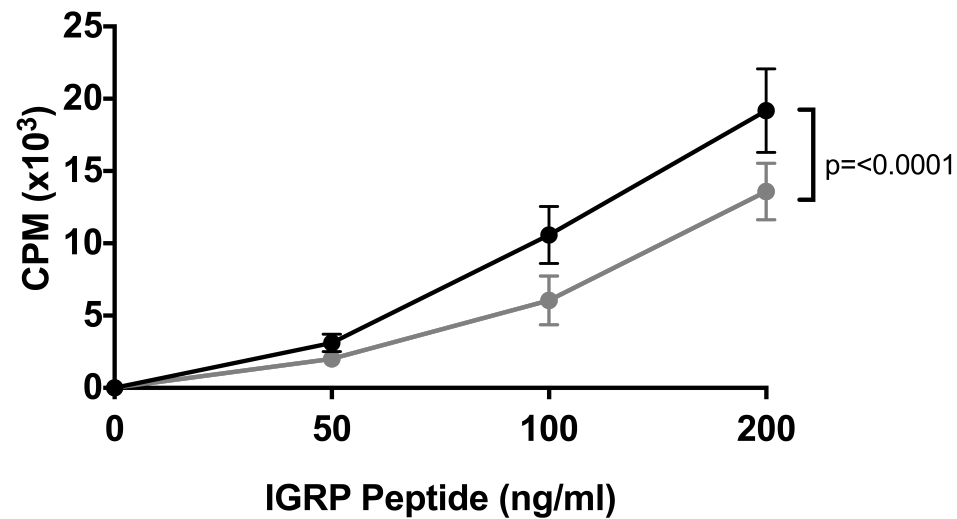

Supplement: NIHMS1711416-supplement-supplementary_materials.pdf [file NIHMS1711416-supplement-supplementary_materials.pdf]
